# Supplementary material for: Japanese Encephalitis Enzootic and Epidemic Risks across Australia
Source: MDPI journal article supplement (doi:10.3390/v15020450), 2023-02-06
Supplement: s1 [file s1]

**Supplementary Table S1.** List of waterbirds suspected to be reservoirs, for whom ecological niche models were combined.

| S/N | Common name         | Scientific name                   | Reference                                                                                            |
|-----|---------------------|-----------------------------------|------------------------------------------------------------------------------------------------------|
| 1   | Intermediate egret  | <i>Ardea intermedia</i>           | Graham et al., (2019); Slater, P., Slater, P., & Slater, R. (2003).                                  |
| 2   | Cattle egret        | <i>Ardea ibis</i>                 | Graham et al 2019; Slater, P., Slater, P., & Slater, R. (2003).                                      |
| 3   | Little egret        | <i>Egretta garzetta</i>           | Graham et al 2019; Slater, P., Slater, P., & Slater, R. (2003).                                      |
| 4   | Eastern reef egret  | <i>Egretta sacra</i>              | Graham et al 2019, McKilligan, N. E. I. L. (2002); Slater, P., Slater, P., & Slater, R. (2003).      |
| 5   | Eastern great egret | <i>Ardea modesta</i>              | Graham et al 2019; Slater, P., Slater, P., & Slater, R. (2003).                                      |
| 6   | Nankeen night-heron | <i>Nycticorax caledonicus</i>     | Graham et al 2019, Maddock, 2011; Slater, P., Slater, P., & Slater, R. (2003).                       |
| 7   | White-faced heron   | <i>Egretta novaehollandiae</i>    | Graham et al 2019; Chambers and Lyon 2006; Slater, P., Slater, P., & Slater, R. (2003).              |
| 8   | White-necked heron  | <i>Ardea pacifica</i>             | Graham et al 2019; Slater, P., Slater, P., & Slater, R. (2003).                                      |
| 9   | Striated heron      | <i>Butorides striatus</i>         | Graham et al 2019; Slater, P., Slater, P., & Slater, R. (2003).                                      |
| 10  | Black bittern       | <i>Ixobrychus flavicollis</i>     | Graham et al 2019; Slater, P., Slater, P., & Slater, R. (2003).                                      |
| 11  | Australian bittern  | <i>Botaurus poiciloptilus</i>     | Graham et al 2019; Slater, P., Slater, P., & Slater, R. (2003).                                      |
| 12  | Black-necked stork  | <i>Ephippiorhynchus asiaticus</i> | Graham et al 2019; Clancy, G. P., & Ford, H. A. (2013); Slater, P., Slater, P., & Slater, R. (2003). |

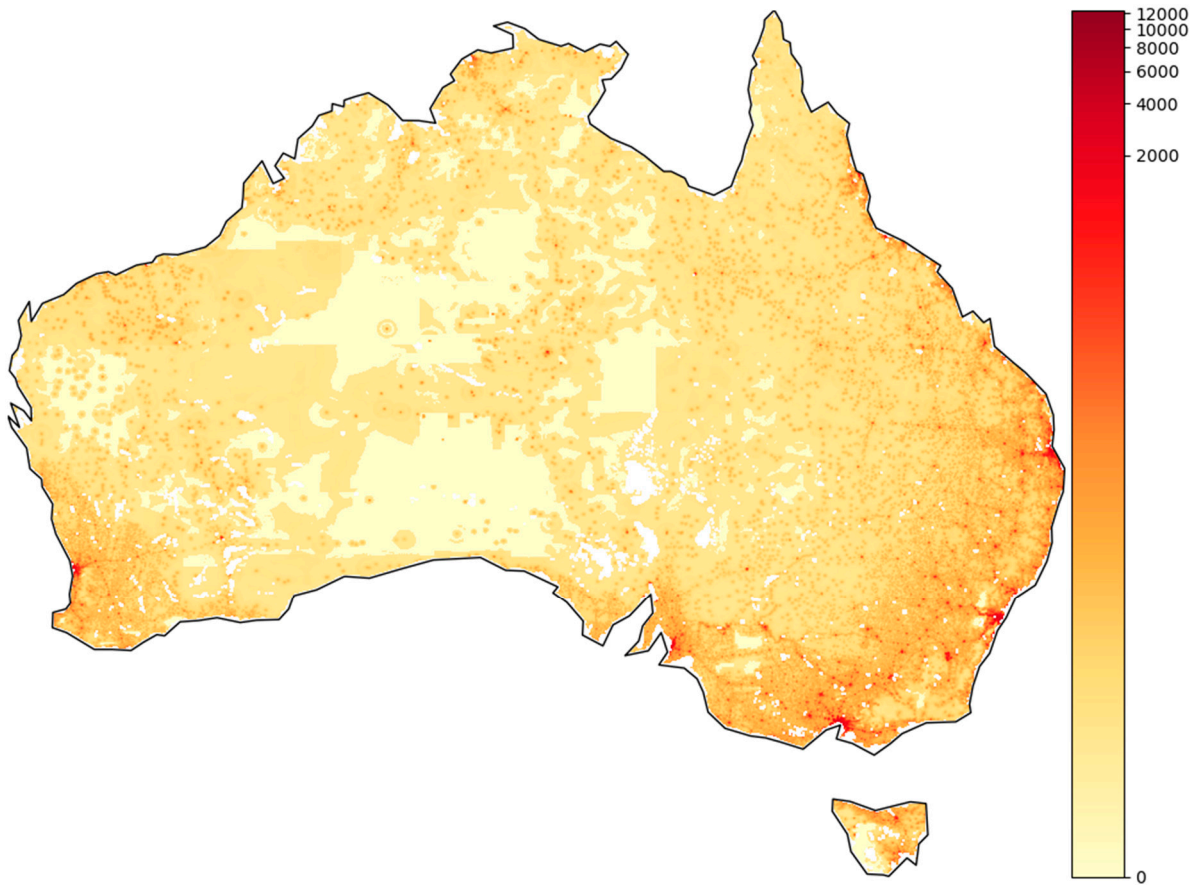

**Supplementary Figure S1.** Relative human population density across Australia, with the colour bar using a power law to enable visualisation of the distribution detail outside of the major cities (see Section 2.5 in the paper).

### Supplementary File S1. Statistical approaches used in the study.

The probabilities of vector presence and wild bird presence were combined using the standard probabilistic approach,

$$k_s = 1 - \left[ \prod_{i=1}^N 1 - p_{i,s} \right], \quad (S1)$$

where  $p_{i,s}$  are the estimated presence probabilities for species  $i$ , for the vectors  $N = 3$  (*Cx. annulirostris*, *Cx. sitiens* and *Cx. quinquefasciatus*), and for the birds  $N = 12$  (see Table S1).

The combined enzootic and epidemic risk maps were based on the standard laws of probability, where the probabilistic “or” is given by  $P(A \text{ or } B) = P(A) + P(B) - P(A \text{ and } B)$ , (S2)

And the probabilistic “and” is given by

$$P(A \text{ and } B) = P(A) \times P(B), \quad (S3)$$

noting the assumed independence of A and B.
